# Supplementary material for: Myocardial Perfusion Defects in Hypertrophic Cardiomyopathy Mutation Carriers
Source: PubMed Central journal article supplement — J Am Heart Assoc. 2021 Jul 26;10(15):e020227. doi: 10.1161/JAHA.120.020227 (PMC8475659; doi:10.1161/jaha.120.020227), 2021-07-26

# **SUPPLEMENTAL MATERIAL**

**Table S1. List of likely pathogenic/pathogenic variants in the recruited individuals.**

GnomAD and ClinVar accessed Dec 2019. MAF: minor allele frequency. ACMG: American College of Medical Genetics.

| <b>Individual identifier</b> | <b>Gene</b>   | <b>Variant</b>                      | <b>gnomAD[1]<br/>MAF</b> | <b>ClinVar [2]<br/>classification</b>   | <b>Clinical laboratory classification (following ACMG[3] guidelines)</b> |
|------------------------------|---------------|-------------------------------------|--------------------------|-----------------------------------------|--------------------------------------------------------------------------|
| 1                            | <i>TNNI3</i>  | c.470C>T<br>p.Ala157Val             | Not reported             | Pathogenic, two stars                   | Likely pathogenic                                                        |
| 2                            | <i>MYBPC3</i> | c.2373_2374insG<br>p.Trp792Valfs*41 | 0.0000174                | Pathogenic, two stars                   | Pathogenic                                                               |
| 3                            | <i>TNNT2</i>  | c.305G>A<br>p.Arg102Gln             | Not reported             | Pathogenic/likely pathogenic, two stars | Likely pathogenic                                                        |
| 4                            | <i>MYBPC3</i> | c.1168delC<br>p.His390Metfs*16      | Not reported             | Pathogenic, two stars                   | Pathogenic                                                               |

|    |               |                                |                 |                                                   |                   |
|----|---------------|--------------------------------|-----------------|---------------------------------------------------|-------------------|
| 5  | <i>TPM1</i>   | Asp175Asn                      | 0.0000159       | Pathogenic,<br>two stars                          | Likely pathogenic |
| 6  | <i>MYBPC3</i> | p.Lys543Argfs*12<br>c.1628delA | Not<br>reported | Pathogenic,<br>zero stars                         | Pathogenic        |
| 7  | <i>MYBPC3</i> | c.1624+4A>T                    | 0.0000133       | Pathogenic/lik<br>ely<br>pathogenic,<br>two stars | Pathogenic        |
| 8  | <i>TNNI3</i>  | c.470C>T<br>p.Ala157Val        | Not<br>reported | Pathogenic,<br>two stars                          | Likely pathogenic |
| 9  | <i>MYH7</i>   | c.1477A>C<br>p.Met493Leu       | Not<br>reported | Not reported                                      | Likely pathogenic |
| 10 | <i>MYH7</i>   | c.1324C>T<br>p.Arg442Cys       | 0.0000199       | Conflicting<br>interpretation,<br>1 star          | Likely pathogenic |
| 11 | <i>TNNI3</i>  | c.433C>T<br>p.Arg145Trp        | 0.00000402      | Pathogenic,<br>two stars                          | Likely pathogenic |

|    |               |                                |              |                                         |                   |
|----|---------------|--------------------------------|--------------|-----------------------------------------|-------------------|
| 12 | <i>MYBPC3</i> | c.1628delA<br>p.Lys543Argfs*12 | Not reported | Pathogenic,<br>zero stars               | Pathogenic        |
| 13 | <i>MYBPC3</i> | c.3163A>T<br>p.Lys1055*        | Not reported | Likely pathogenic,<br>one star          | Pathogenic        |
| 14 | <i>MYBPC3</i> | c.1504C>T<br>p.Arg502Trp       | 0.000401     | Conflicting interpretation,<br>one star | Likely pathogenic |
| 15 | <i>MYBPC3</i> | c.2096delC<br>p.Pro699Glnfs*55 | Not reported | Pathogenic,<br>two stars                | Pathogenic        |
| 16 | <i>MYBPC3</i> | c.1628delA<br>p.Lys543Argfs*12 | Not reported | Pathogenic,<br>zero stars               | Pathogenic        |
| 17 | <i>MYBPC3</i> | c.1227-13G>A                   | 0.0000125    | Conflicting interpretation,<br>one star | Likely pathogenic |
| 18 | <i>MYH7</i>   | c.2389G>A<br>p.Ala797Thr       | 0.0000239    | Pathogenic/likely                       | Likely pathogenic |

|    |               |                                     |                 |                                               |                   |
|----|---------------|-------------------------------------|-----------------|-----------------------------------------------|-------------------|
|    |               |                                     |                 | pathogenic,<br>two stars                      |                   |
| 19 | <i>MYBPC3</i> | c.1624+4A>T                         | 0.0000133       | Pathogenic/likely<br>pathogenic,<br>two stars | Pathogenic        |
| 20 | <i>MYBPC3</i> | c.2373_2374insG<br>p.Trp792Valfs*41 | 0.0000174       | Pathogenic,<br>two stars                      | Pathogenic        |
| 21 | <i>MYBPC3</i> | c.2373_2374insG<br>p.Trp792Valfs*41 | 0.0000174       | Pathogenic,<br>two stars                      | Pathogenic        |
| 22 | <i>MYBPC3</i> | c.3163A>T<br>p.Lys1055*             | Not<br>reported | Likely<br>pathogenic,<br>one star             | Pathogenic        |
| 23 | <i>MYBPC3</i> | c.1928-2A>G                         | Not<br>reported | Pathogenic,<br>two stars                      | Pathogenic        |
| 24 | <i>MYBPC3</i> | c.1483C>G<br>p.Arg495Gly            | 0.00000401      | Pathogenic/likely<br>pathogenic,<br>two stars | Likely pathogenic |

|    |               |                          |              |                                            |                   |
|----|---------------|--------------------------|--------------|--------------------------------------------|-------------------|
| 25 | <i>MYH7</i>   | c.1711G>A<br>p.Gly571Arg | Not reported | Uncertain significance,<br>one star        | Pathogenic        |
| 26 | <i>TNNT2</i>  | c.247G>A<br>p.Glu83Lys   | Not reported | Likely pathogenic,<br>one star             | Likely pathogenic |
| 27 | <i>MYH7</i>   | c.2123G>A<br>p.Gly708Asp | Not reported | Not reported                               | Likely pathogenic |
| 28 | <i>TNNI3</i>  | c.484C>T<br>p.Arg162Trp  | 0.0000402    | Pathogenic/likely pathogenic,<br>two stars | Likely pathogenic |
| 29 | <i>MYBPC3</i> | c.1624+4A>T              | 0.0000133    | Pathogenic/likely pathogenic,<br>two stars | Pathogenic        |
| 30 | <i>TNNI3</i>  | c.484C>T<br>p.Arg162Trp  | 0.0000402    | Pathogenic/likely pathogenic,<br>two stars | Likely pathogenic |

|    |               |                                     |              |                                            |                   |
|----|---------------|-------------------------------------|--------------|--------------------------------------------|-------------------|
| 31 | <i>MYBPC3</i> | c.3293G>A<br>p.Trp1098*             | Not reported | Pathogenic,<br>two stars                   | Pathogenic        |
| 32 | <i>MYH7</i>   | c.2123G>A<br>p.Gly708Asp            | Not reported | Not reported                               | Likely pathogenic |
| 33 | <i>MYBPC3</i> | c.2167C>T<br>p.Arg723Cys            | Not reported | Not reported                               | Pathogenic        |
| 34 | <i>MYBPC3</i> | c.2458C>T<br>p.Arg820Trp            | 0.00000401   | Conflicting interpretation,<br>one star    | Likely pathogenic |
| 35 | <i>MYBPC3</i> | c.2373_2374insG<br>p.Trp792Valfs*41 | 0.0000174    | Pathogenic,<br>two stars                   | Pathogenic        |
| 36 | <i>MYBPC3</i> | c.772G>A<br>p.Glu258Lys             | 0.0000166    | Pathogenic/likely pathogenic,<br>two stars | Likely pathogenic |

|    |               |                                     |              |                                               |                   |
|----|---------------|-------------------------------------|--------------|-----------------------------------------------|-------------------|
| 37 | <i>MYBPC3</i> | c.2950C>T<br>p.Gln984*              | Not reported | Pathogenic,<br>one star                       | Pathogenic        |
| 38 | <i>MYBPC3</i> | c.2373_2374insG<br>p.Trp792Valfs*41 | 0.0000174    | Pathogenic,<br>two stars                      | Pathogenic        |
| 39 | <i>MYBPC3</i> | p.Val454Cysfs*12<br>c.1359delT      | Not reported | Pathogenic,<br>one star                       | Pathogenic        |
| 40 | <i>MYBPC3</i> | c.1483C>G<br>p.Arg495Gly            | 0.00000401   | Pathogenic/likely<br>pathogenic,<br>two stars | Likely pathogenic |
| 41 | <i>MYBPC3</i> | c.1224-19G>A                        | 0.0000256    | Likely<br>pathogenic,<br>two stars            | Likely pathogenic |
| 42 | <i>MYH7</i>   | c.1750G>A<br>p.Gly584Ser            | Not reported | Pathogenic/likely<br>pathogenic,<br>two stars | Pathogenic        |



|    |               |                                                                                   |              |                                            |                   |
|----|---------------|-----------------------------------------------------------------------------------|--------------|--------------------------------------------|-------------------|
| 43 | <i>MYBPC3</i> | c.1224-19G>A                                                                      | 0.0000256    | Likely pathogenic,<br>two stars            | Likely pathogenic |
| 44 | <i>MYH7</i>   | c.1750G>A<br>p.Gly584Ser                                                          | Not reported | Pathogenic/likely pathogenic,<br>two stars | Pathogenic        |
| 45 | <i>MYBPC3</i> | c.(2602+1_2603-1)<br>(3825_?)del<br>NC_000011.9:g.(?_47353422)<br>(47357562_?)del | Not reported | Not reported                               | Pathogenic        |
| 46 | <i>CSRP3</i>  | c.131T>C<br>p.Leu44Pro                                                            | 0.000012     | Conflicting interpretation,<br>one star    | Likely pathogenic |
| 47 | <i>MYL2</i>   | c.173G>A<br>p.Arg58Gln                                                            | 0.00000795   | Pathogenic/likely pathogenic,<br>two stars | Likely pathogenic |
| 48 | <i>MYBPC3</i> | c.1504C>T<br>p.Arg502Trp                                                          | 0.000401     | Conflicting interpretation,<br>one star    | Likely pathogenic |

|    |               |                          |                 |                                      |                   |
|----|---------------|--------------------------|-----------------|--------------------------------------|-------------------|
| 49 | <i>MYH7</i>   | c.2539A>G<br>p.Lys847Glu | Not<br>reported | Likely<br>pathogenic,<br>three stars | Likely pathogenic |
| 50 | <i>MYBPC3</i> |                          |                 |                                      |                   |

**Figure S1. Qualitative and quantitative myocardial hypoperfusion in hypertrophic cardiomyopathy (HCM) mutation carriers in the absence of significant hypertrophy and fibrosis.** A. Adenosine stress perfusion maps in the 3 SAX slices, where each pixel encodes myocardial blood flow as per the color scale. B. Corresponding raw stress perfusion imaging. C. Corresponding SAX cine. (perfusion scans are acquired partly in systole). D. Corresponding SAX PSIR LGE imaging. Arrows demonstrate the perfusion defects. LGE = late gadolinium enhancement, PSIR = phase sensitive inversion recovery, SAX = short axis.

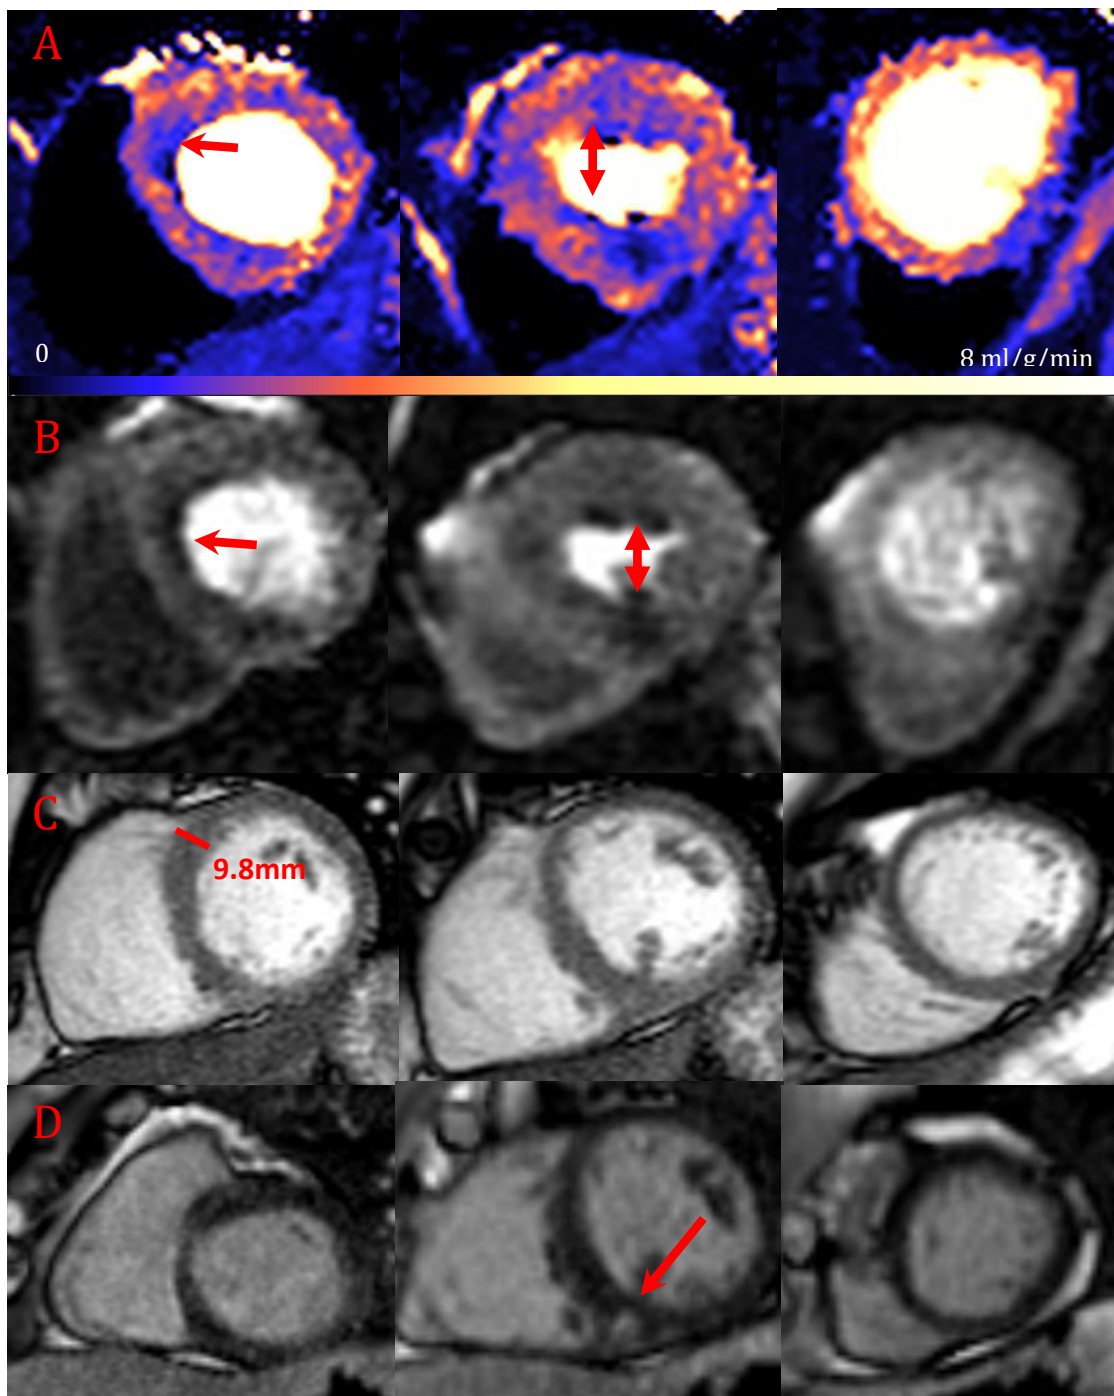

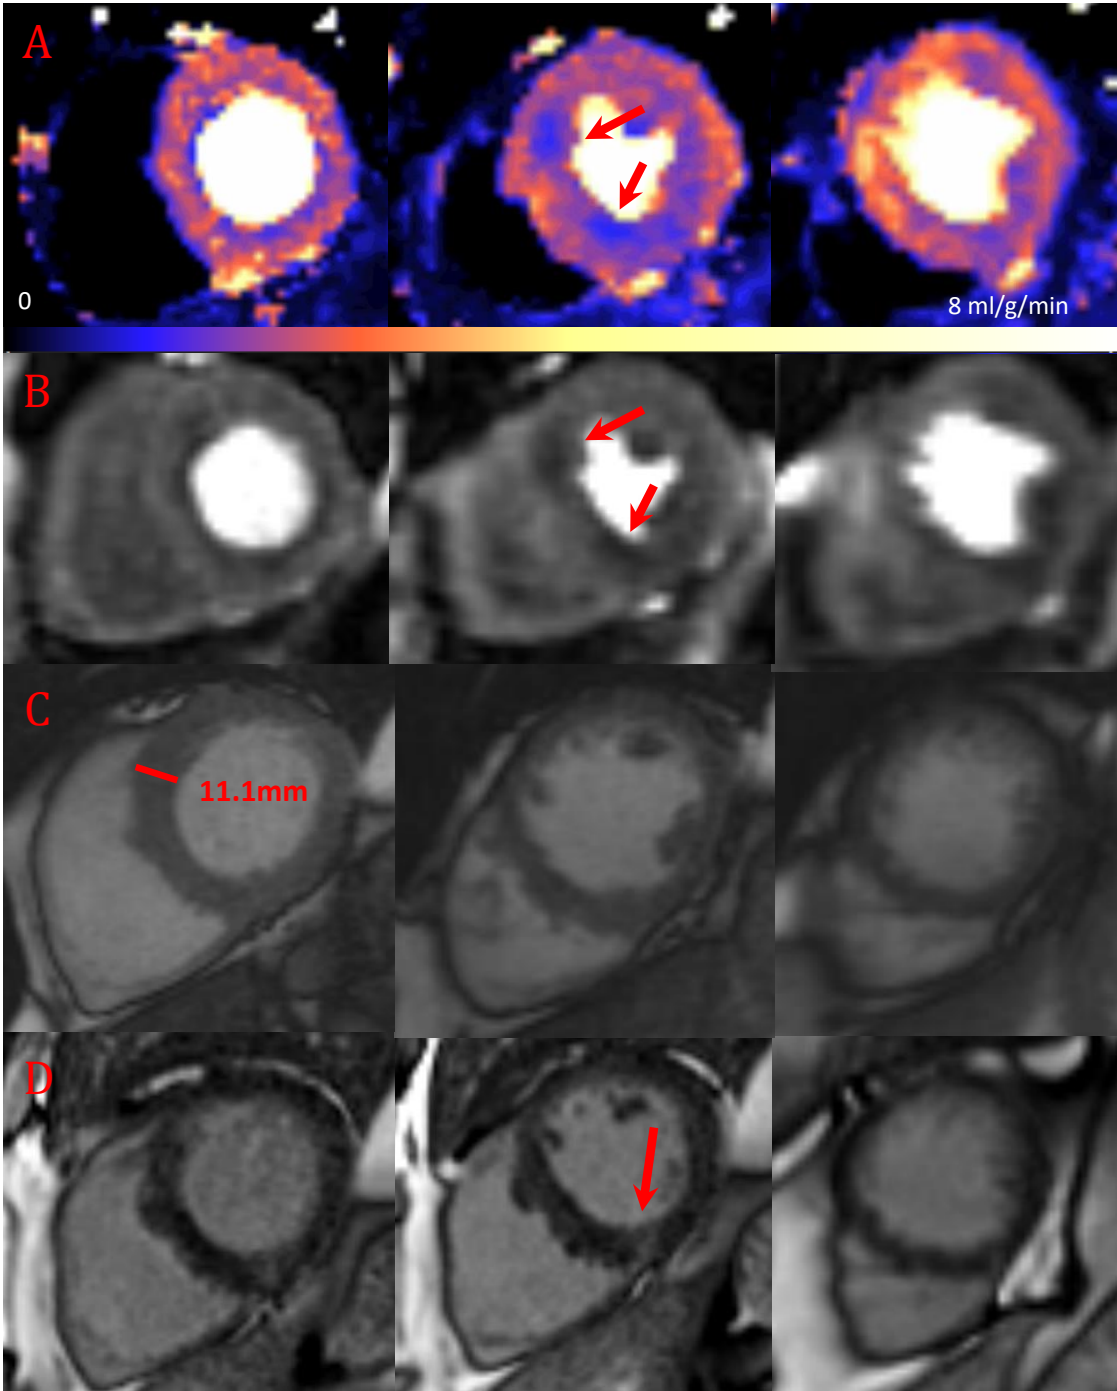

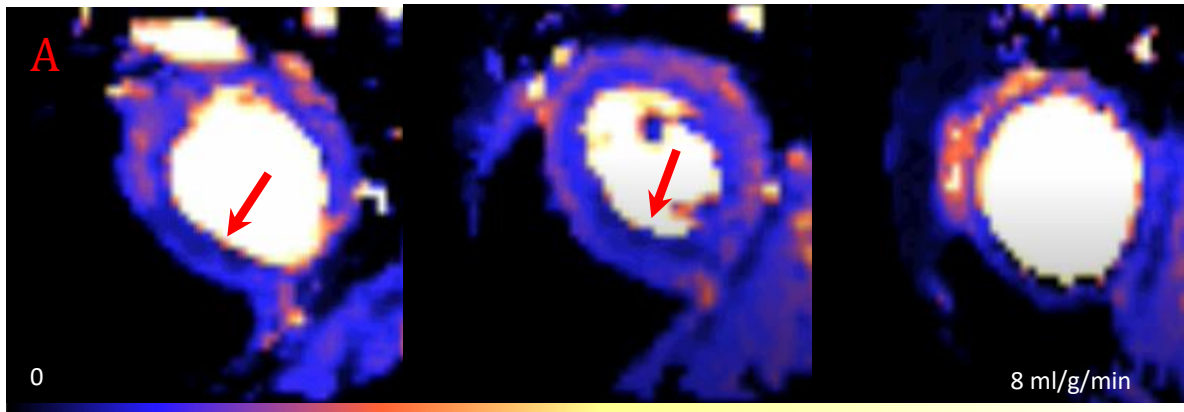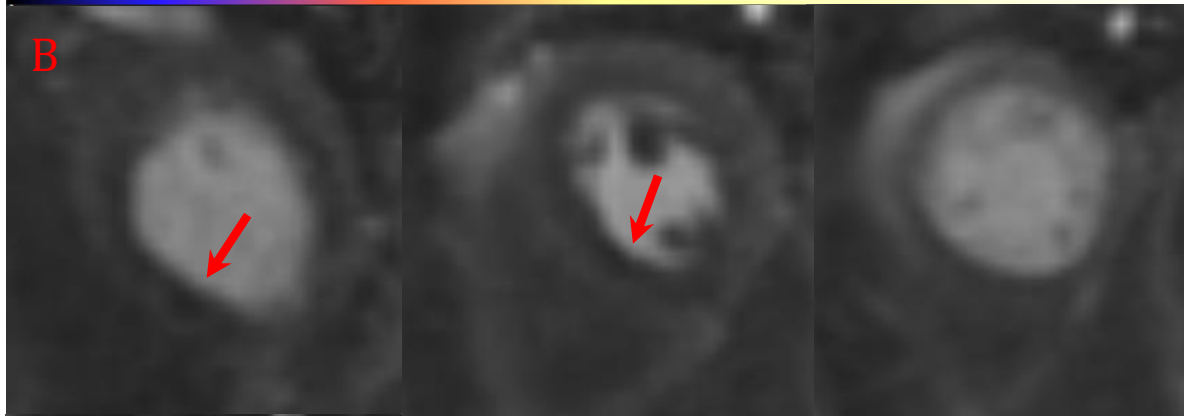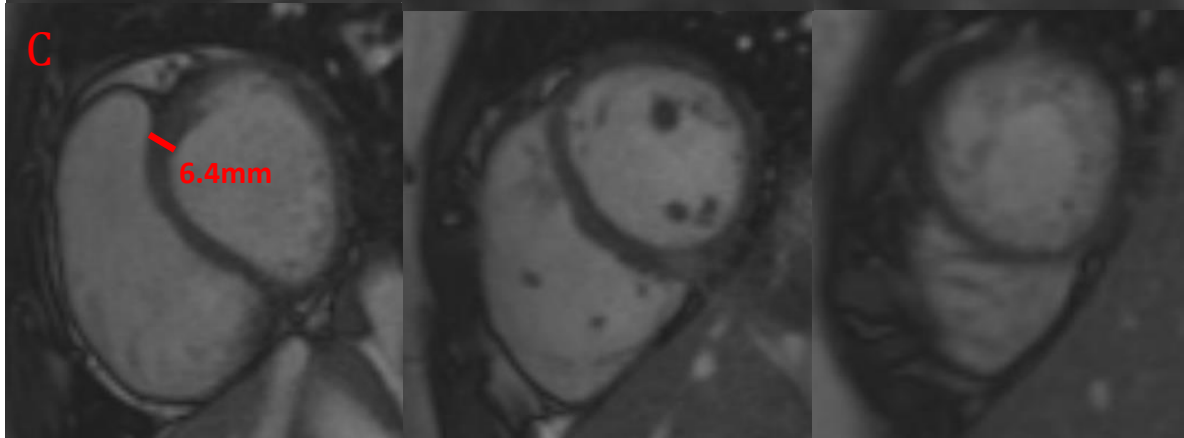

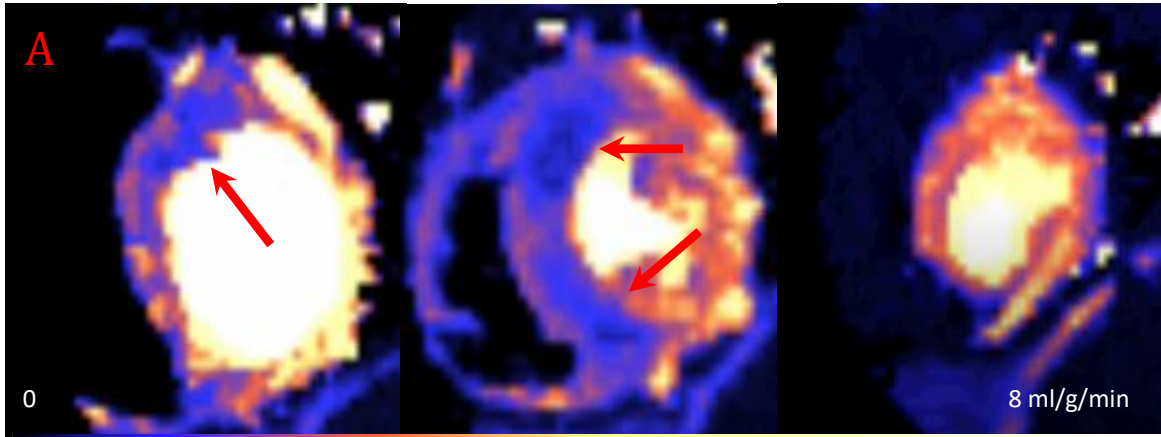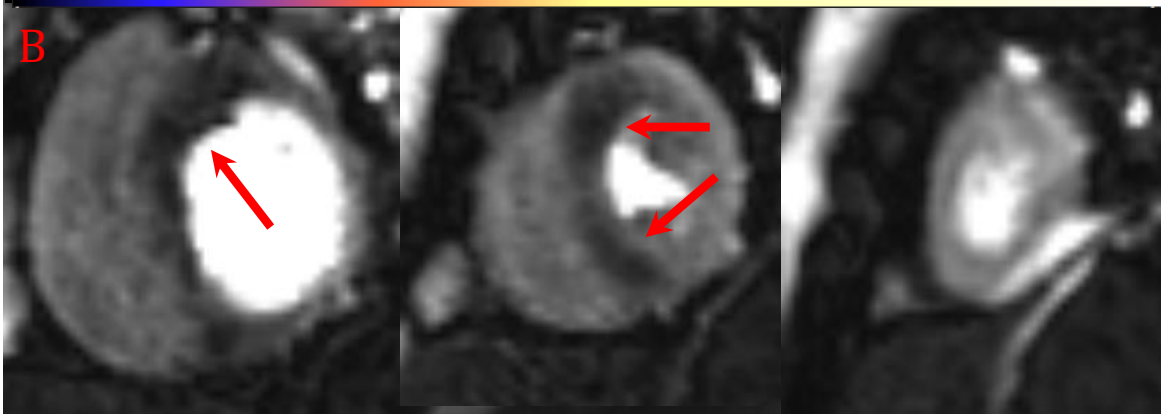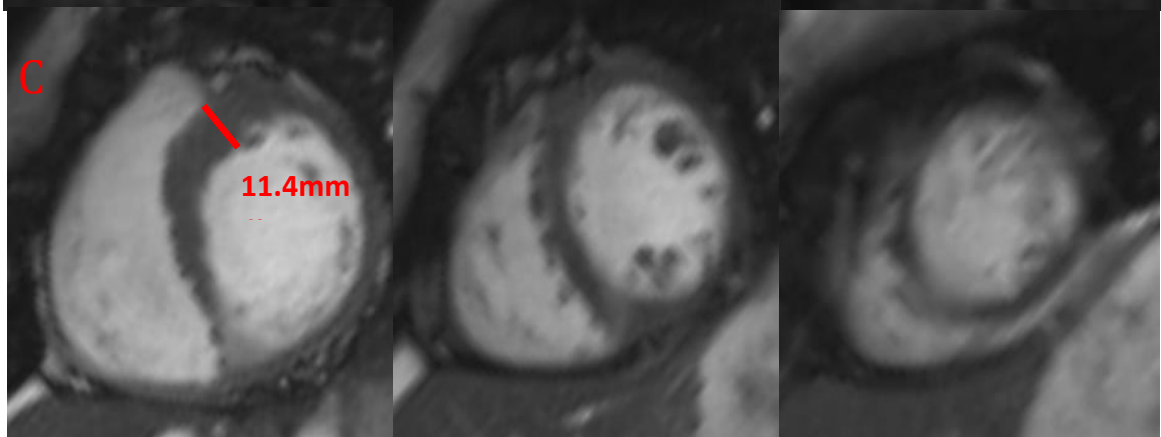



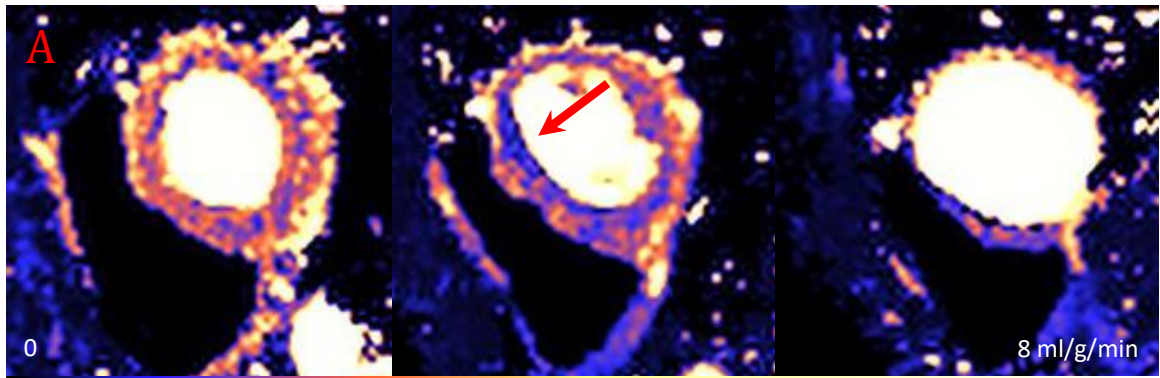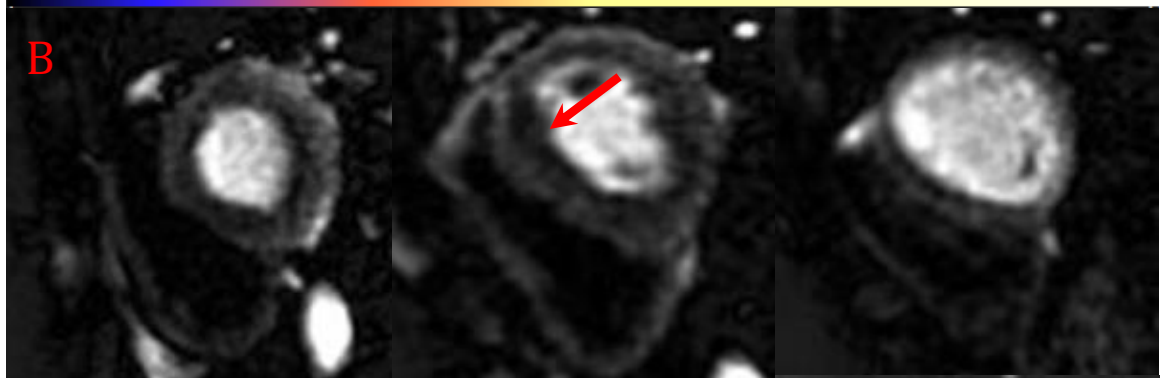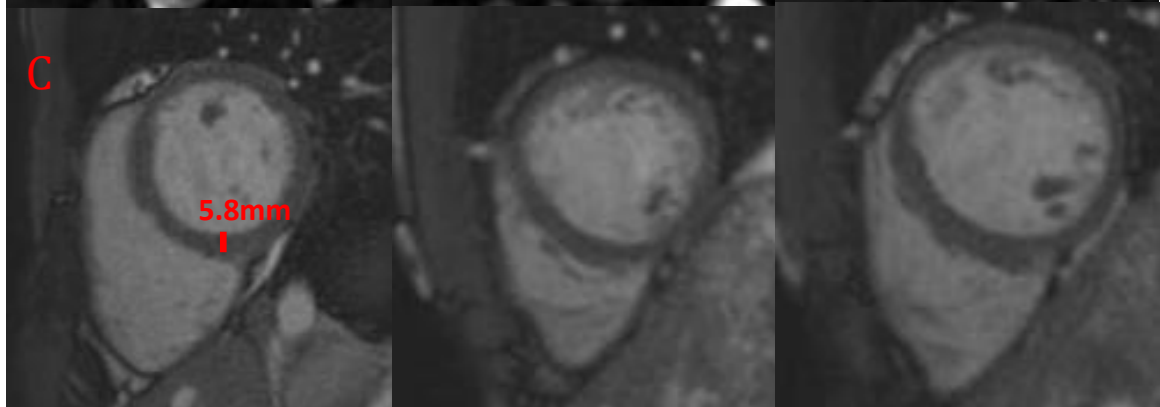

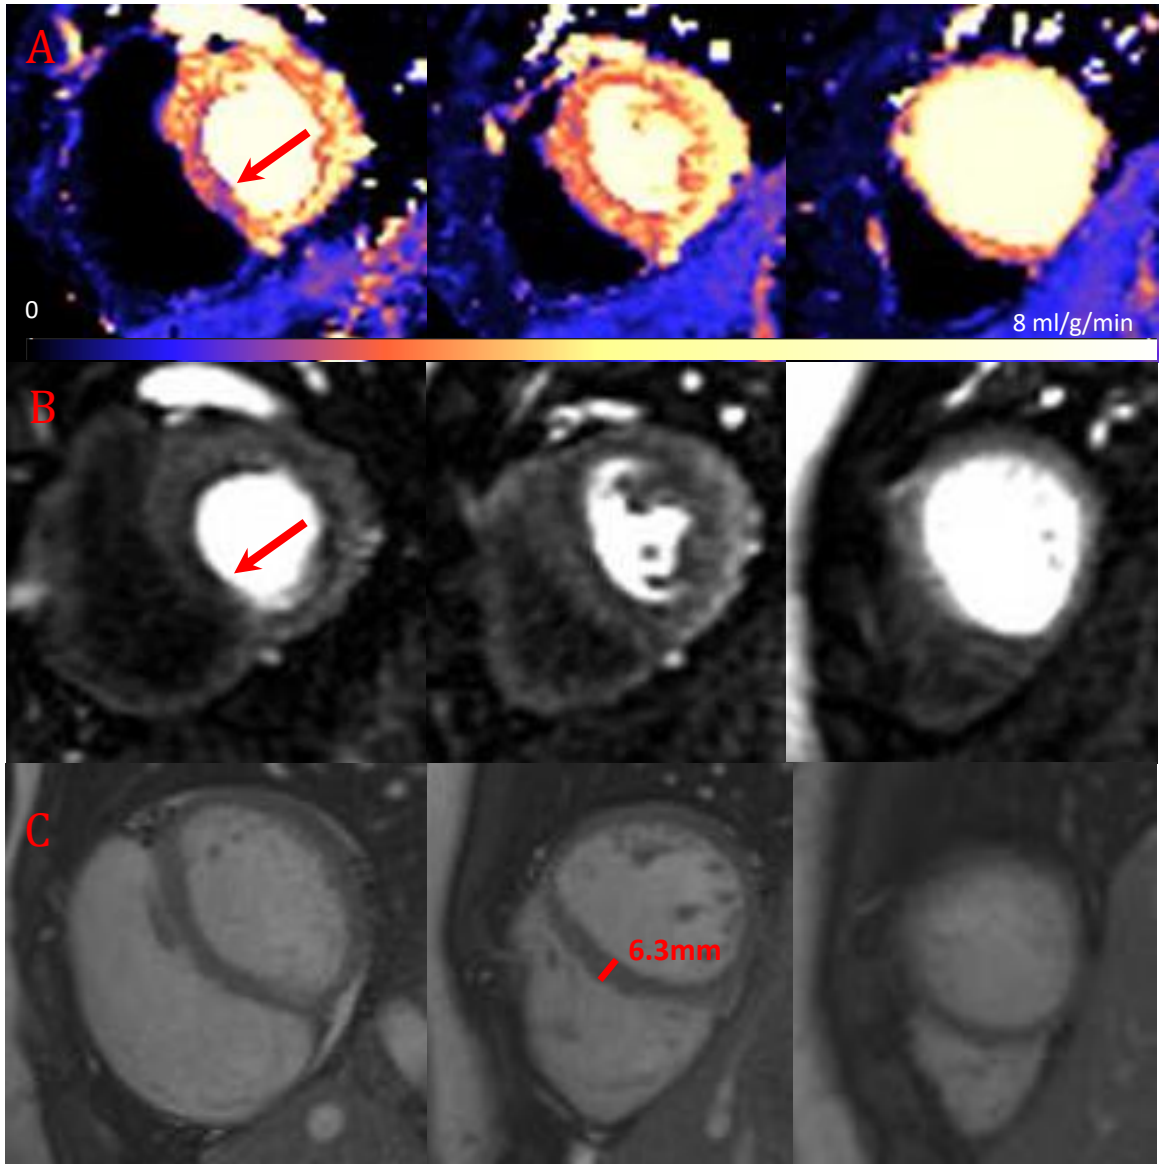



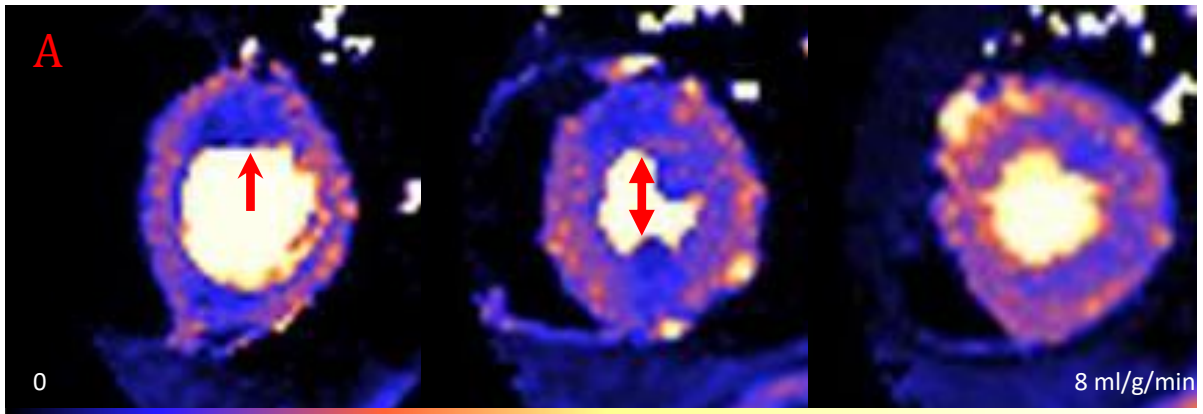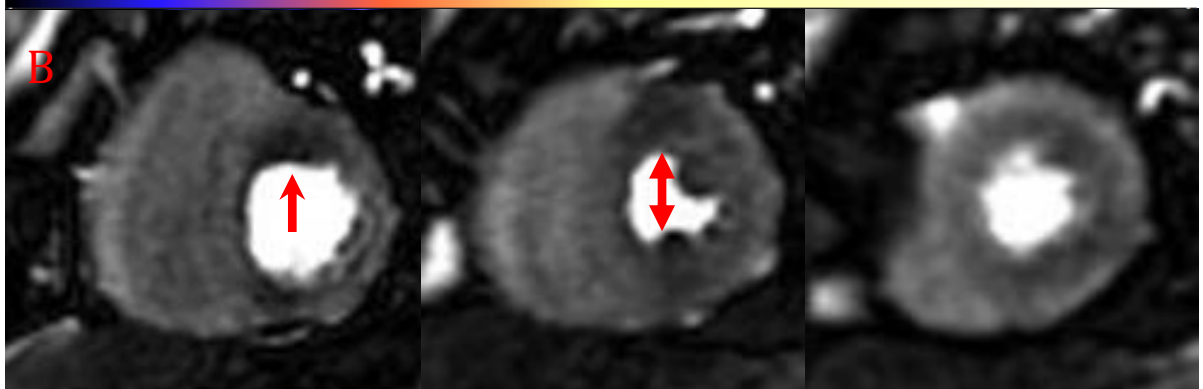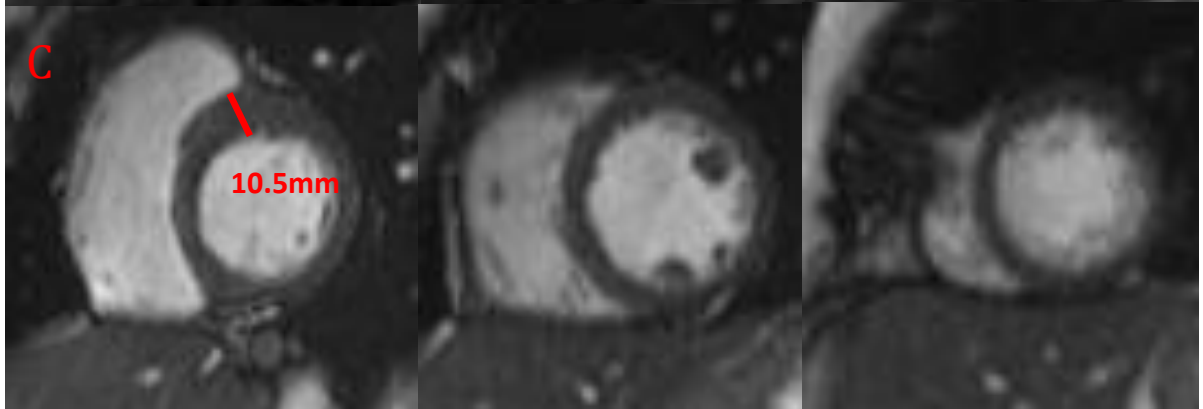

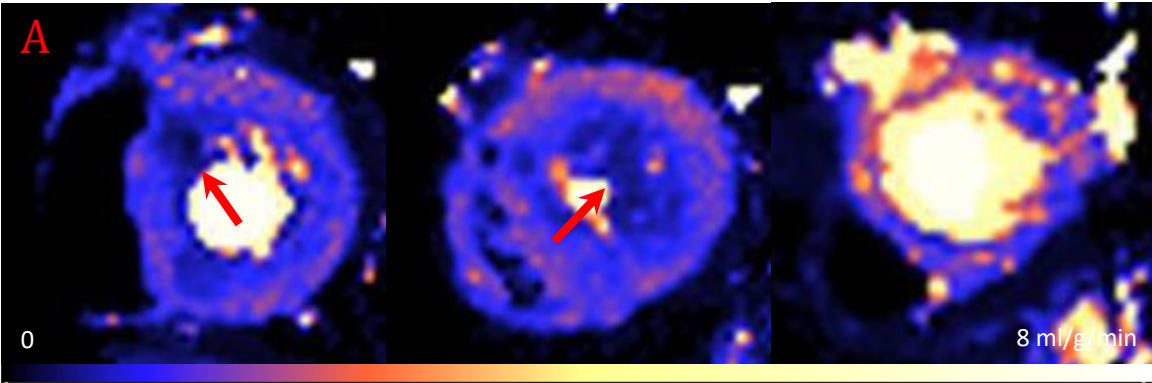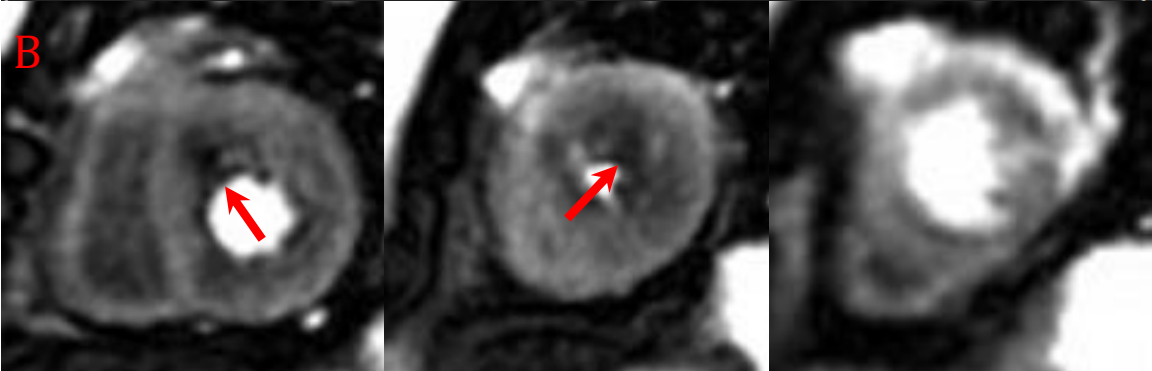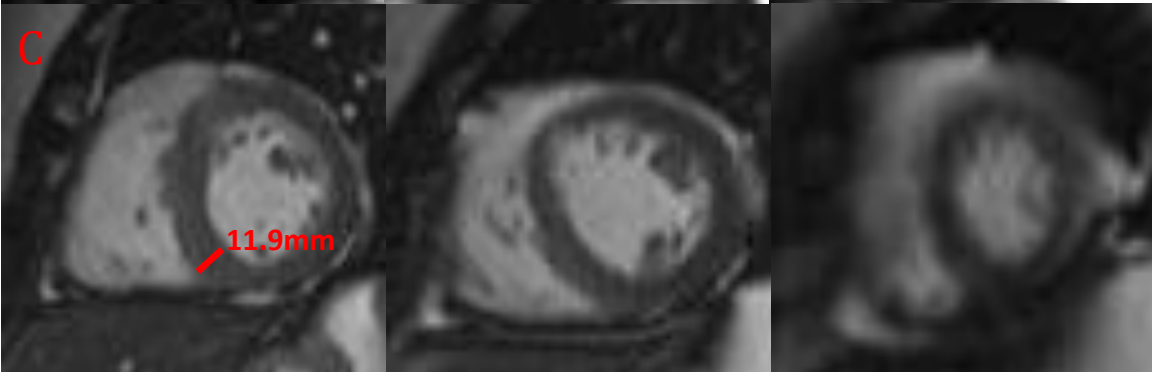

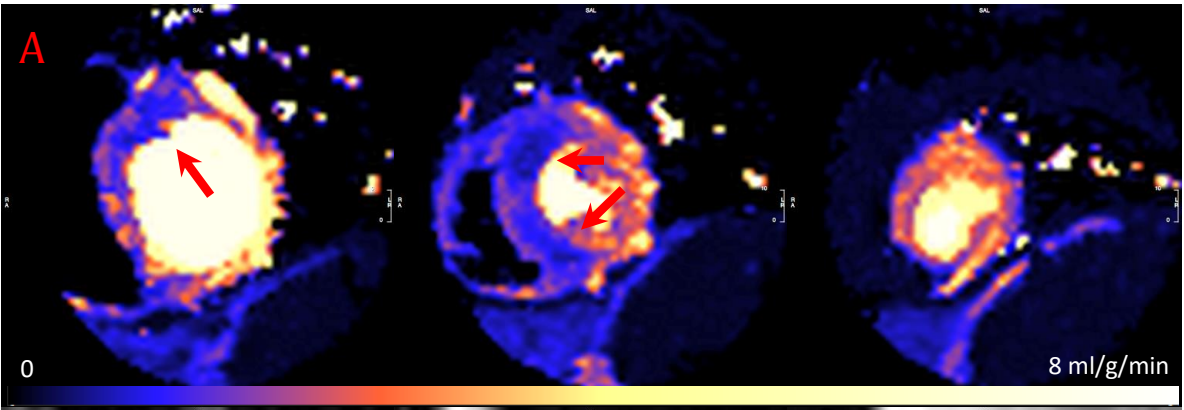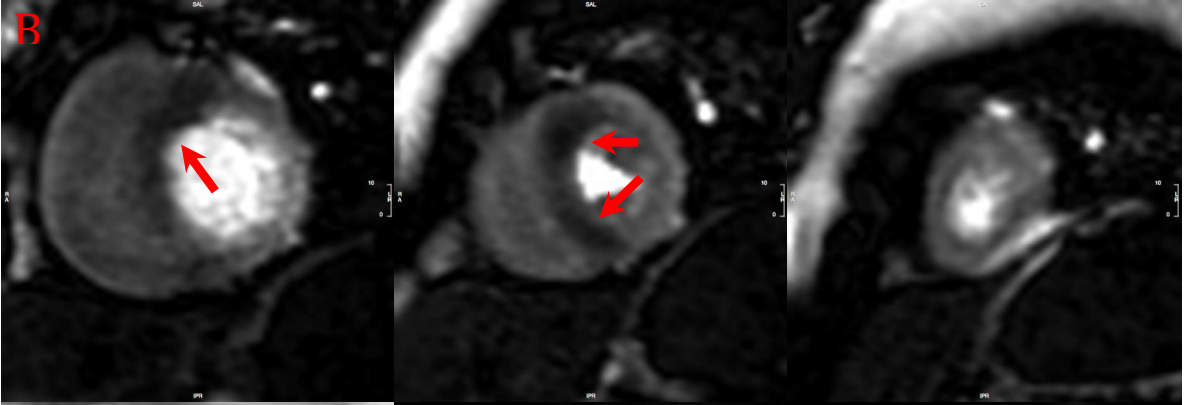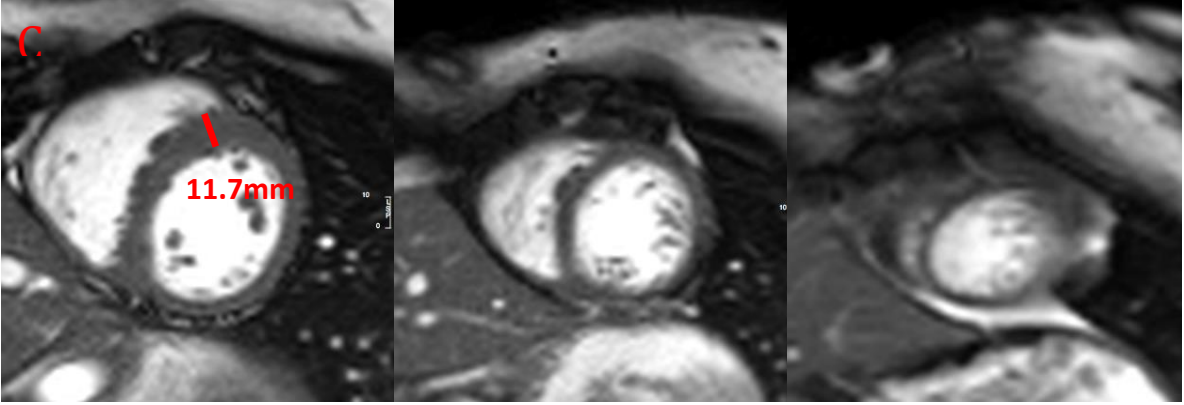

Supplement: JAH3-10-e020227-s001.pdf [file JAH3-10-e020227-s001.pdf]
